# Supplementary material
Source: PubMed Central journal article supplement (PMC5736000)
Supplement: NIHMS925591-supplement-5.pdf [file NIHMS925591-supplement-5.pdf]

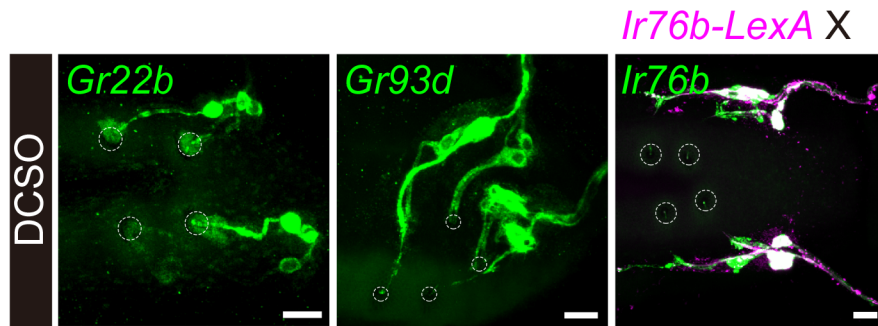

**Figure S1. Occasional expression of *Gr22b*-/*Gr93d*-*GAL4* drivers in pharyngeal neurons of DCSO. Related to Figure 3.**

Occasional expression in the DCSO of indicated *GAL4* drivers tested with *UAS-mCD8-GFP* (green). Overlap of *Ir76b-GAL4* (green) and *Ir76b-LexA* (magenta) in the DCSO. Scale bar: 10  $\mu\text{m}$ .
